# Supplementary material for: A facile route to prepare mixed transition metal oxide yolk–shell microspheres for enhanced lithium storage
Source: Royal Society of Chemistry journal article supplement (doi:10.1039/c9dt01770d), 2019-01-01
Supplement: c9dt01770d1.pdf [file c9dt01770d1.pdf]

## Supporting information

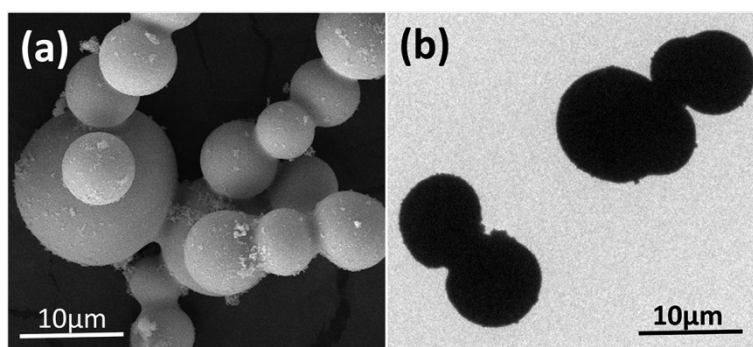

Fig. S1 SEM (a) and (b) TEM images of  $\text{ZnCo}_2\text{O}_4$  precursors.

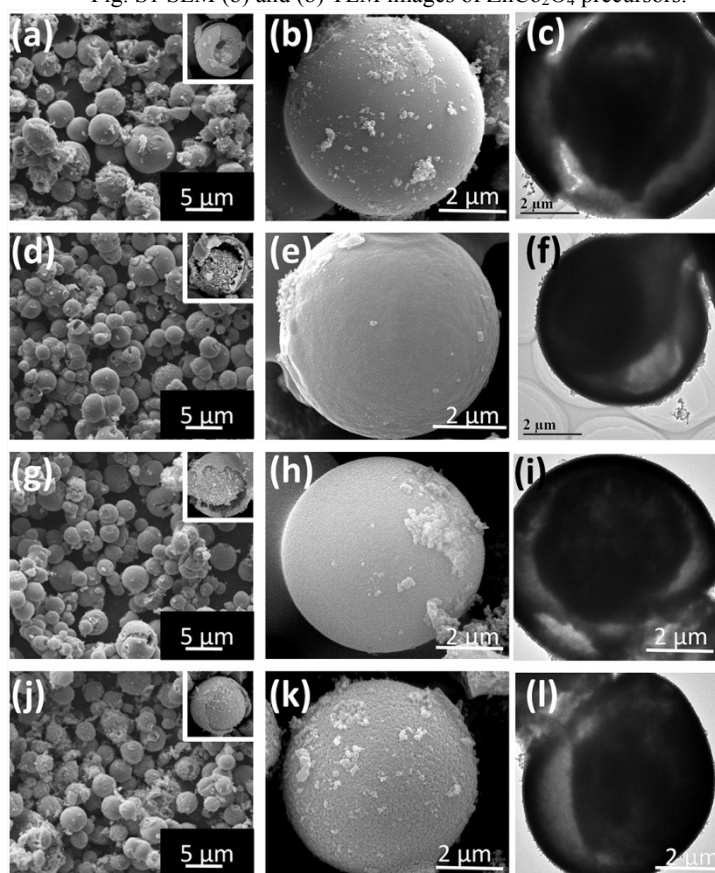

Fig. S2 SEM and TEM images of (a-c)  $\text{MnCo}_2\text{O}_4$ ; (d-f)  $\text{NiCo}_2\text{O}_4$ ; (g-i)  $\text{CoMn}_2\text{O}_4$ ; (j-l)  $\text{ZnMn}_2\text{O}_4$  microspheres with yolk-shell structure, the insets are corresponding high-magnification SEM images.

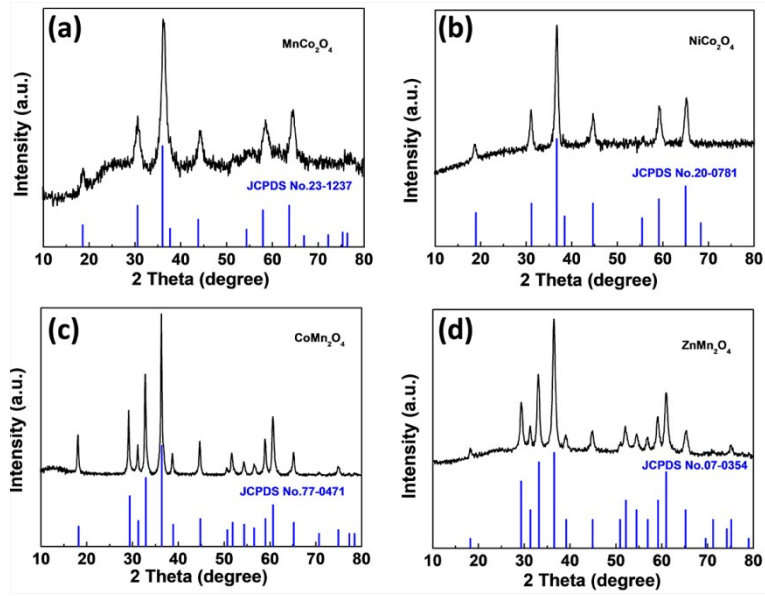

Fig. S3 XRD patterns of (a)  $\text{MnCo}_2\text{O}_4$ ; (b)  $\text{NiCo}_2\text{O}_4$ ; (c)  $\text{CoMn}_2\text{O}_4$ ; (d)  $\text{ZnMn}_2\text{O}_4$

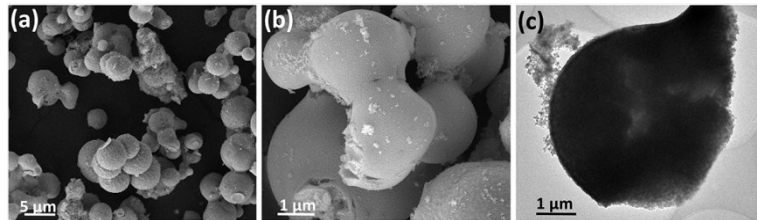

Fig. S4 SEM and TEM images of  $\text{ZnCo}_2\text{O}_4$  solid microspheres without PEG-400.

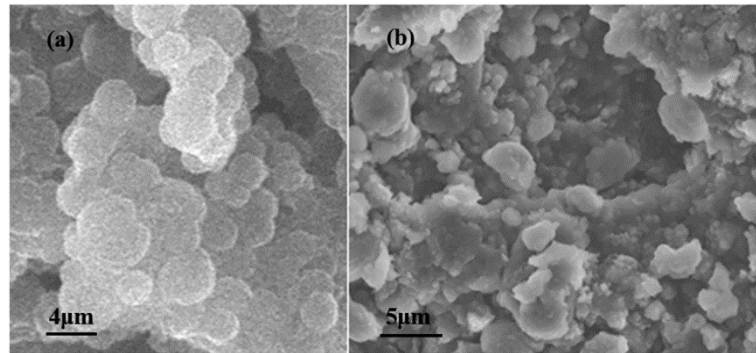

Fig. S5 SEM images of yolk-shell  $\text{ZnCo}_2\text{O}_4$  microspheres (a) and solid  $\text{ZnCo}_2\text{O}_4$  microspheres (b) at the current density of  $900 \text{ mA g}^{-1}$  for 100 cycles.

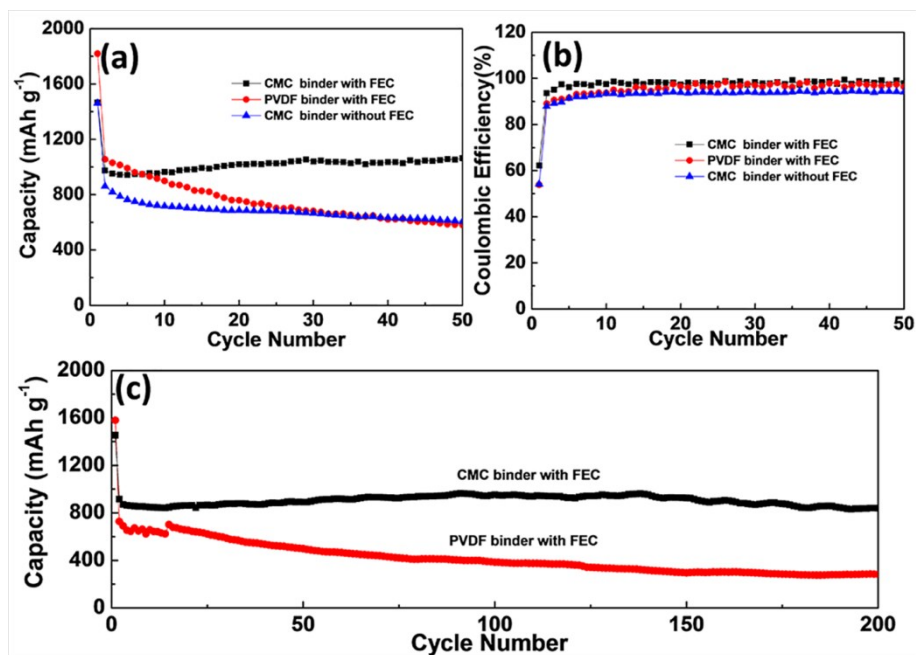

Fig. S6 (a) Cycling performance at the current of  $200 \text{ mA} \cdot \text{g}^{-1}$  and (b) coulombic efficiency, (c) discharge cycling performance of ZnCo<sub>2</sub>O<sub>4</sub> yolk-shell microspheres at the current density of  $900 \text{ mA} \cdot \text{g}^{-1}$  with different binders with or without FEC.
